# Supplementary material for: A facile and generic method to improve cathode materials for lithium-ion batteries via utilizing nanoscale surface amorphous films of self-regulating thickness
Source: Royal Society of Chemistry journal article supplement (doi:10.1039/c4cp00869c), 2014-01-01
Supplement: c4cp00869c1.pdf [file c4cp00869c1.pdf]

## Electronic Supplementary Information

### **A Facile and Generic Method to Improve Cathode Materials for Lithium-Ion Batteries via Utilizing Nanoscale Surface Amorphous Films of Self-Regulating Thickness**

Jiajia Huang and Jian Luo\*

*Department of NanoEngineering; Program of Materials Science and Engineering  
University of California, San Diego  
La Jolla, CA 92093-0448, USA*

---

\*Corresponding author. Email address: [jluo@alum.mit.edu](mailto:jluo@alum.mit.edu)

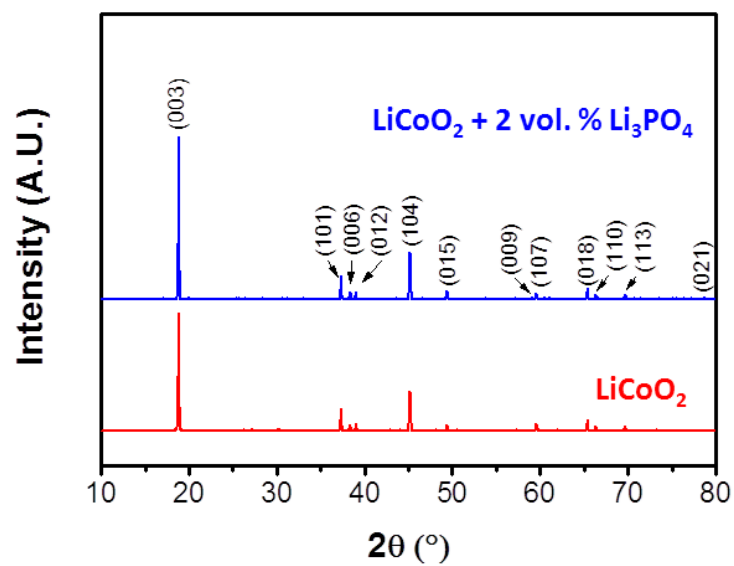

**Fig. S1** XRD patterns of the  $\text{LiCoO}_2$  and  $\text{LiCoO}_2 + 2 \text{ vol. \% Li}_3\text{PO}_4$  specimens that were milled and subsequently annealed at  $600^\circ\text{C}$  for 4 h.

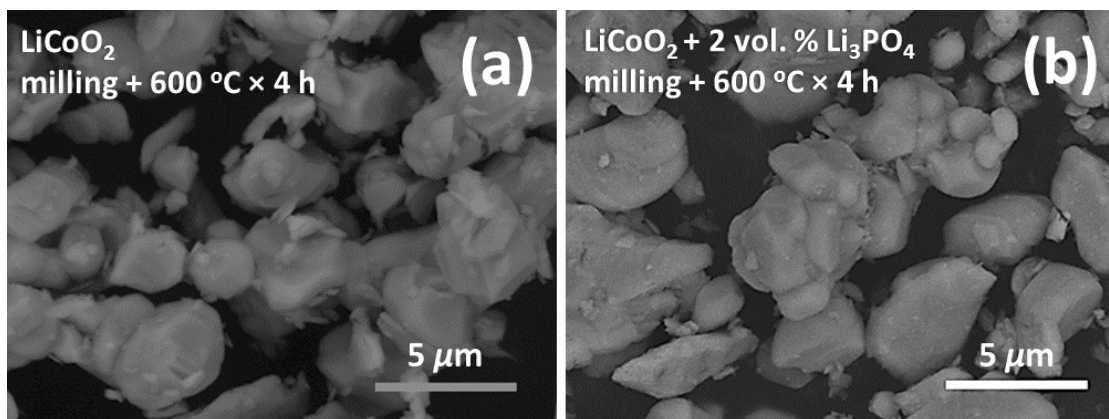

**Fig. S2** Representative SEM images of the **(a)** LiCoO<sub>2</sub> and **(b)** LiCoO<sub>2</sub> + 2 vol. % Li<sub>3</sub>PO<sub>4</sub> specimens that were milled and subsequently annealed at 600 °C for 4 h.

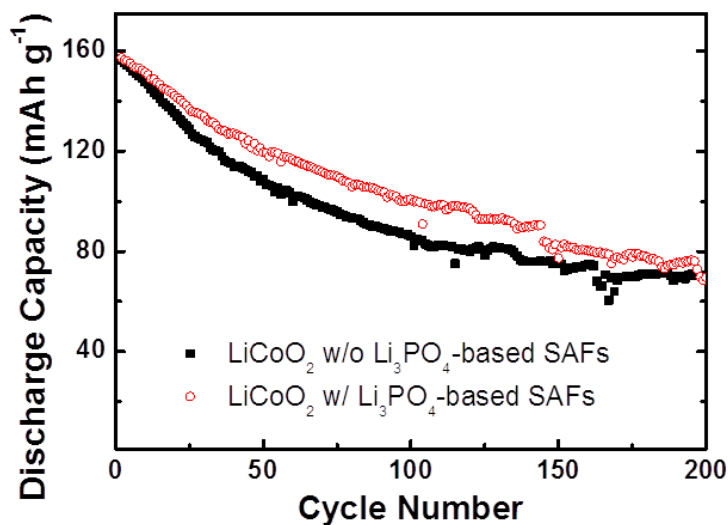

**Fig. S3** Cycling stability of LiCoO<sub>2</sub> specimens with and without Li<sub>3</sub>PO<sub>4</sub>-based SAFs that were cycled between 3 V and 4.5 V (*vs.* Li/Li<sup>+</sup>) at the charge/discharge rate of 1C at room temperature. The capacity fading is appreciably lower in the specimen with ~ 2.5 nm thick SAFs. It is possible that the SAFs disintegrated after ~140 cycles due to the strain accumulation resulted from cycling at the extended voltage range of 3 V to 4.5 V.

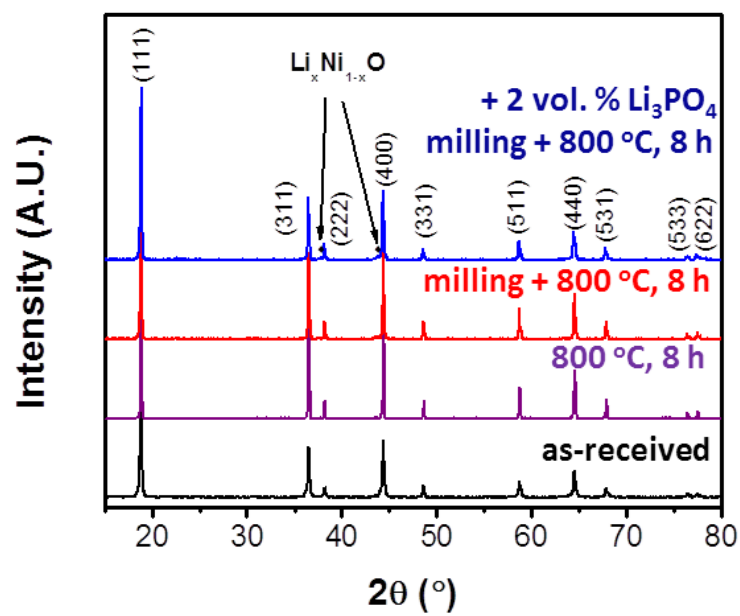

**Fig. S4** XRD patterns of various  $\text{LiMn}_{1.5}\text{Ni}_{0.5}\text{O}_4$  specimens. Minor amounts of a secondary crystalline phase of  $\text{Li}_x\text{Ni}_{1-x}\text{O}$  were detected in the milled and annealed specimens.

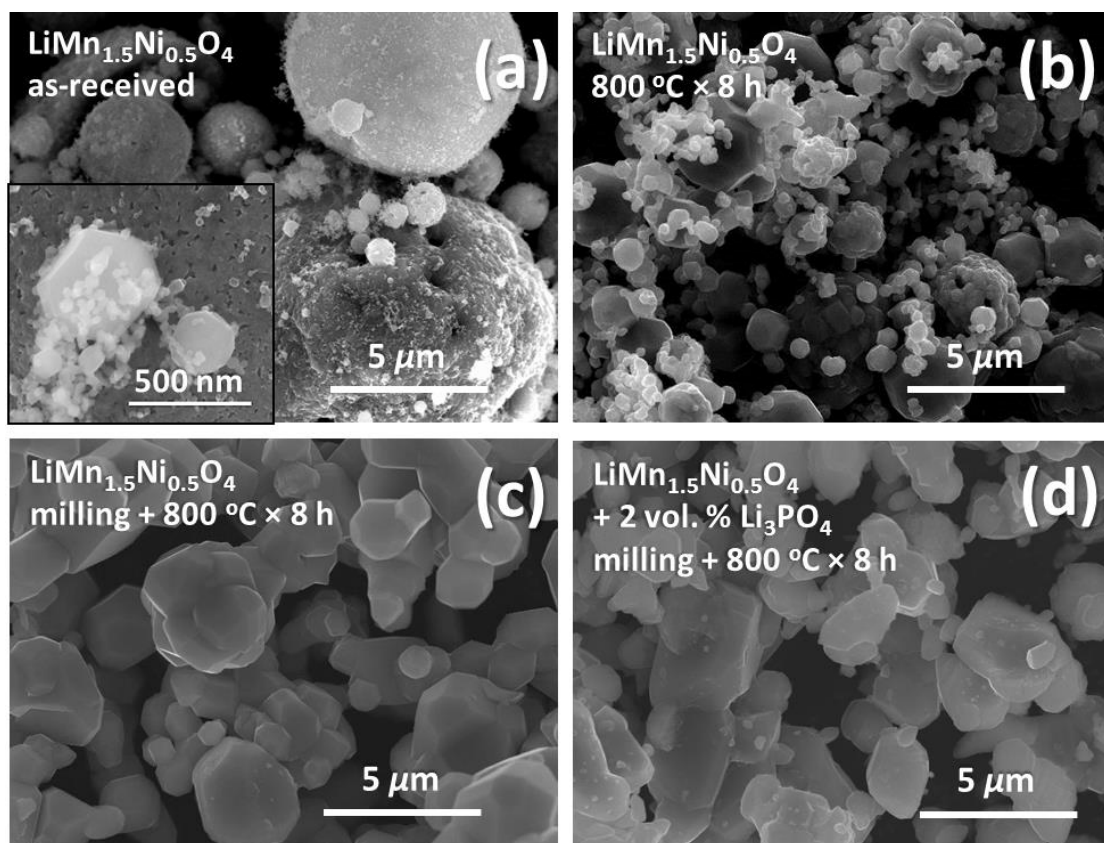

**Fig. S5** Representative SEM images of **(a)** the as-received  $\text{LiMn}_{1.5}\text{Ni}_{0.5}\text{O}_4$  specimen and **(b)** the reference  $\text{LiMn}_{1.5}\text{Ni}_{0.5}\text{O}_4$  specimen annealed at 800  $^{\circ}\text{C}$  (without ball milling), as well as the **(c)**  $\text{LiMn}_{1.5}\text{Ni}_{0.5}\text{O}_4$  and **(d)**  $\text{LiMn}_{1.5}\text{Ni}_{0.5}\text{O}_4$  + 2 vol. %  $\text{Li}_3\text{PO}_4$  specimens that were milled and subsequently annealed at 800  $^{\circ}\text{C}$  for 8 h.

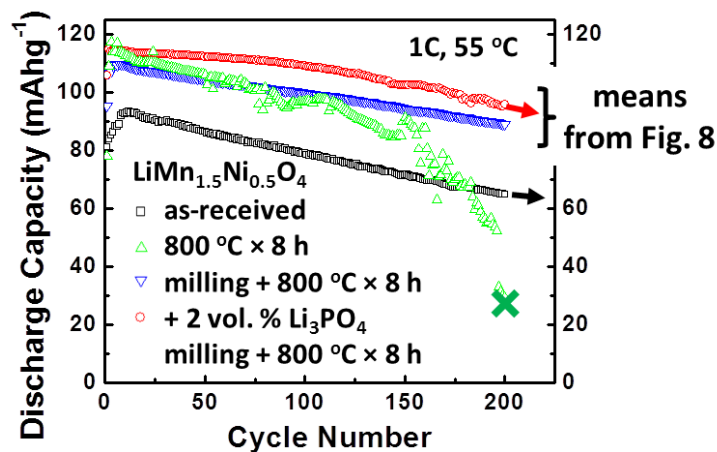

**Fig. S6** Comparison of the cycling performances of the as-received  $\text{LiMn}_{1.5}\text{Ni}_{0.5}\text{O}_4$  specimen and the reference  $\text{LiMn}_{1.5}\text{Ni}_{0.5}\text{O}_4$  specimen annealed at  $800\text{ }^\circ\text{C}$  without ball milling, along with the two means of the  $\text{LiMn}_{1.5}\text{Ni}_{0.5}\text{O}_4$  specimens with and without  $\text{Li}_3\text{PO}_4$ -based SAFs that were milled and annealed at  $800\text{ }^\circ\text{C}$ , which were averaged from the data shown in Fig. 8 (noting that those uncoated specimens that failed before 200 cycles were excluded for obtaining the mean). All fresh cells were charged and discharged at 1C at  $55\text{ }^\circ\text{C}$ . “X” indicates that the battery died.
